# Supplementary material
Source: publisher site journal article supplement (https://www.spandidos-publications.com/8285/downloadSupplementary)

Figure S1. Effect of LPS treatment on the NF- $\kappa$ B pathway and BV-2 cell viability. (A) Western blotting protein bands for p-NF- $\kappa$ B, NF- $\kappa$ B, and GAPDH. (B) Western blotting detection of p-NF- $\kappa$ B/NF- $\kappa$ B levels in BV-2 cells treated with LPS. (C) Viability of BV-2 cells following treatment with LPS.  $^{**}P < 0.01$ . p-, phosphorylated; LPS, lipopolysaccharide; ns, not significant.

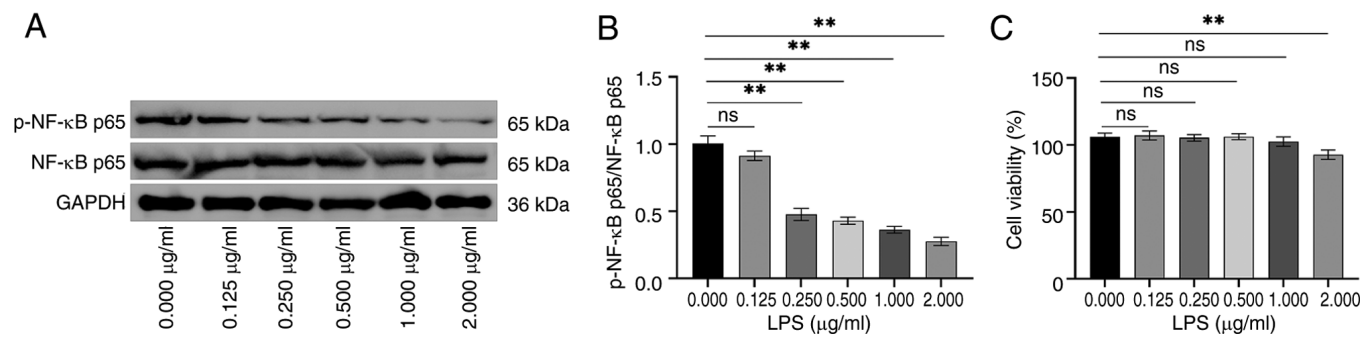

Supplement: Supplementary file 1 [file downloadSupplementary]
